# Supplementary material for: 3D printing of anisotropic polymer nanocomposites with aligned BaTiO3 nanowires for enhanced energy density
Source: Royal Society of Chemistry journal article supplement (doi:10.1039/d0ma00045k), 2020-01-01
Supplement: d0ma00045k1.pdf [file d0ma00045k1.pdf]

## **3D Printing of Anisotropic Polymer Nanocomposites with Aligned BaTiO<sub>3</sub> Nanowires for Enhanced Energy Density**

Hang Luo<sup>a</sup>, Xuefan Zhou<sup>a</sup>, Ru Guo<sup>a</sup>, Xi Yuan<sup>a\*</sup>, Hehao Chen<sup>a</sup>, Isaac Abrahams<sup>b</sup>, Dou Zhang<sup>a\*</sup>

<sup>a</sup> State Key Laboratory of Powder Metallurgy, Central South University, Changsha, Hunan 410083, China

<sup>b</sup> Materials Research Institute, School of Biological Sciences, Queen Mary University of London, Mile End Road, London E1 4NS, UK

The Email of the corresponding author:

dzhang@csu.edu.cn (D. Zhang)

yuanxi0731@163.com (X. Yuan)

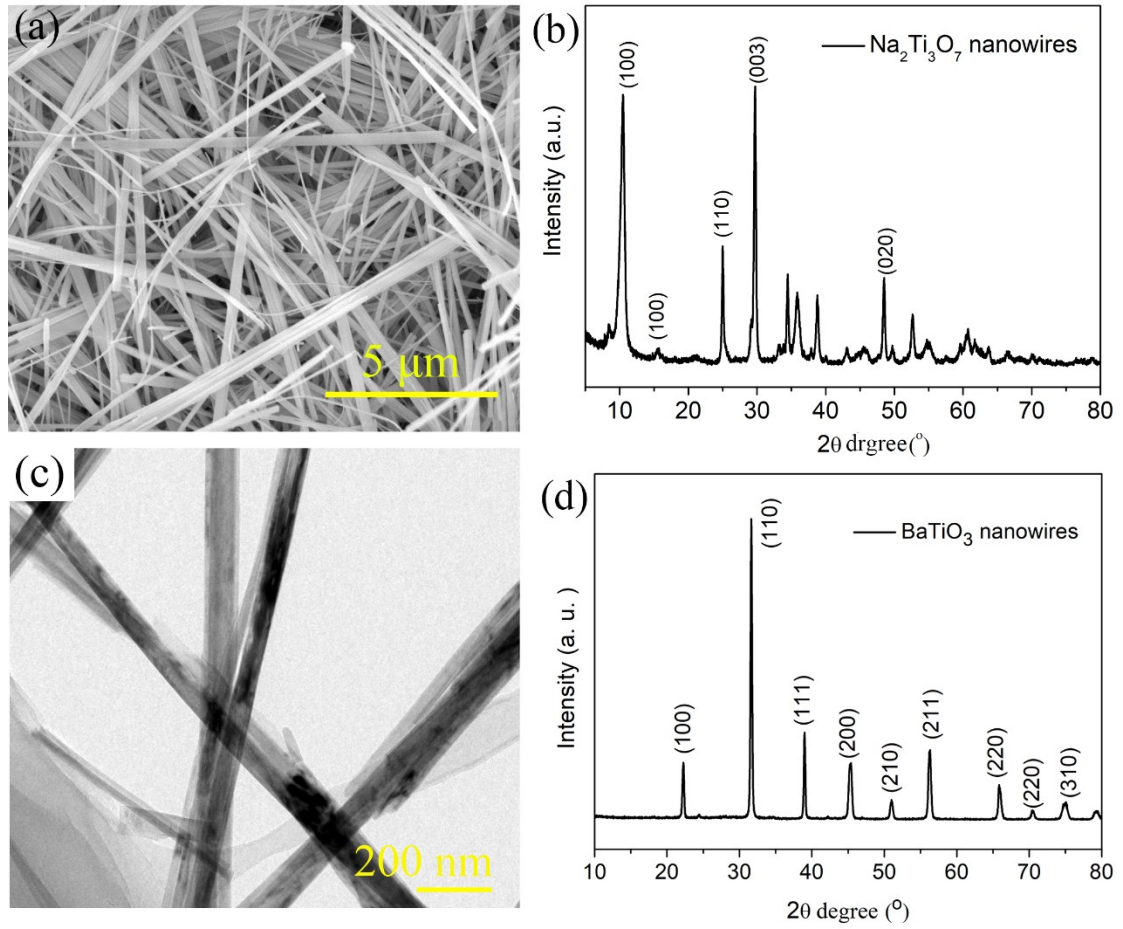

Figure S1 (a) SEM image and (b) XRD pattern of  $\text{Na}_2\text{Ti}_3\text{O}_7$  nanowires; (c) TEM image and (d) XRD pattern of  $\text{BaTiO}_3$  nanowires

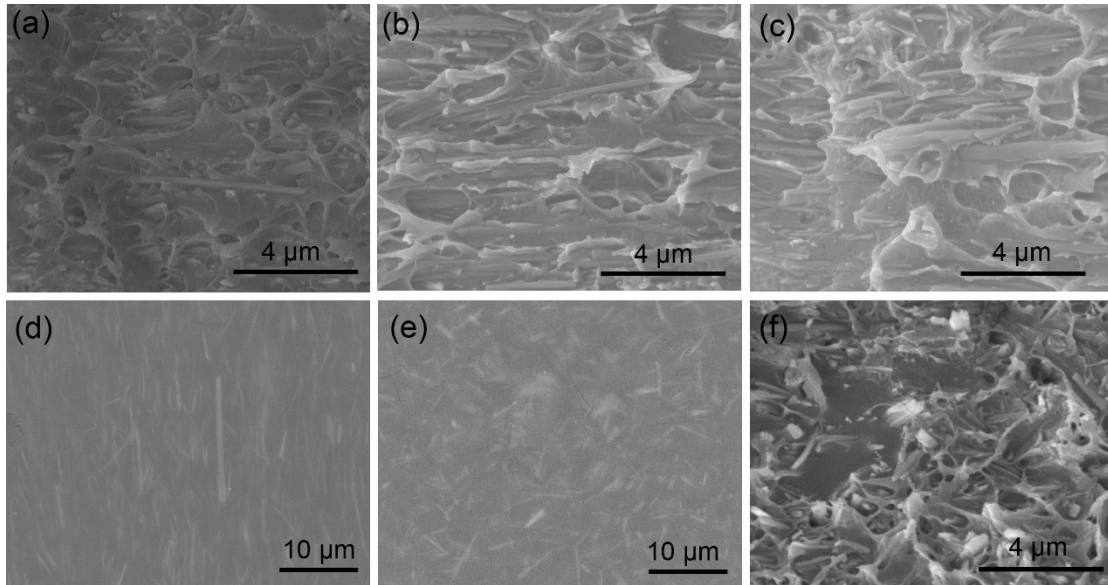

Figure S2 Scanning Electron Microscope (SEM) images of cross-sections of P(VDF-CTFE) nanocomposites with (a) 2.5vol.%, (b) 5.0 vol.%, and (c) 7.5 vol.% aligned BaTiO<sub>3</sub> nanowires, (d) top-surface SEM images of the P(VDF-CTFE) nanocomposites with 5.0 vol.% aligned BaTiO<sub>3</sub> nanowires; For comparison, (e) top-surface (f) cross-section SEM images of P(VDF-CTFE) nanocomposites with 5.0 vol.% randomly distributed BaTiO<sub>3</sub> nanowires.

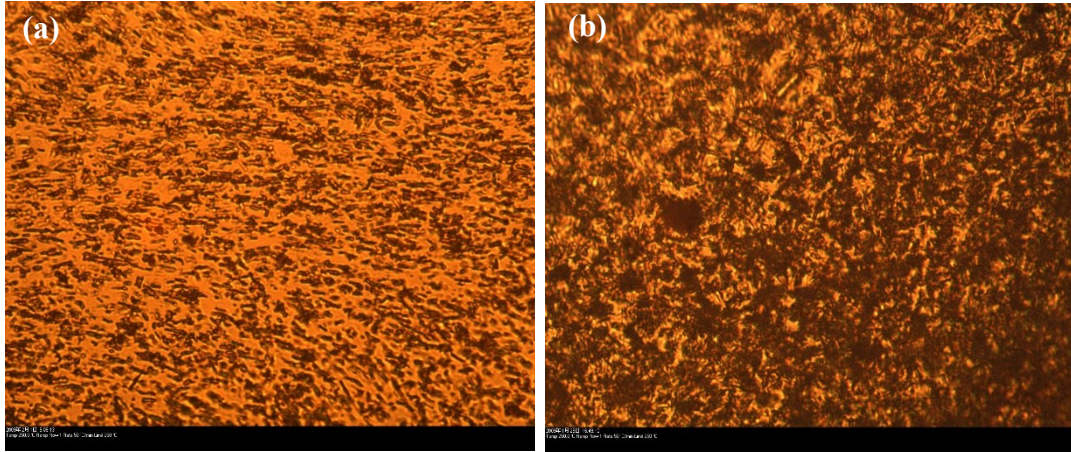

Figure S3 Polarizing microscope (POM) images of the nanocomposites with 5 vol.%  
(a) aligned, and (b) randomly distributed BaTiO<sub>3</sub> nanowires.

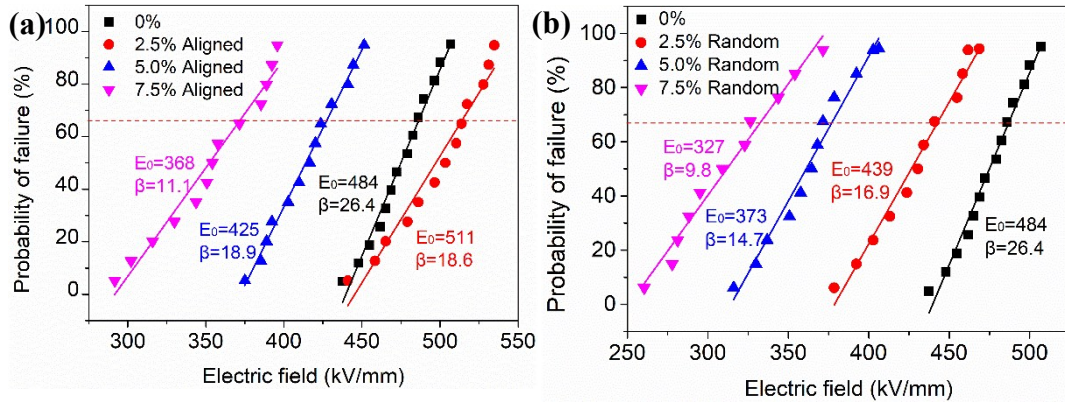

Figure S4 Weibull distributions of the dielectric breakdown strength of P(VDF-CTFE)

nanocomposites filled with (a) aligned and (b) randomly distributed BaTiO<sub>3</sub>

nanowires.
